# Supplementary material
Source: PubMed Central journal article supplement (PMC4840777)
Supplement: NIHMS777621-supplement-Supp3.pdf [file NIHMS777621-supplement-Supp3.pdf]

**Supplementary Table S3 | The effects of selected hypothalamic and pituitary hormones on self-grooming behavior in rodents**

| Hormone                                      | Behavioral effect | References |
|----------------------------------------------|-------------------|------------|
| <b><i>Hypothalamic hormones</i></b>          |                   |            |
| CRH (corticotropin releasing hormone)        | Activation        | 1,2        |
| LHRH (luteinizing hormone releasing hormone) | Activation        | 3          |
| TRH (thyrotropin releasing hormone)          | Activation        | 2,4,5      |
| <b><i>Pituitary hormones</i></b>             |                   |            |
| ACTH (adrenocorticotrophic hormone)          | Activation        | 6-11       |
| αMSH (α-melanocyte stimulating hormone)      | Activation        | 12         |
| Prolactin                                    | Activation        | 13         |
| GH (growth hormone)                          | Activation        | 14         |

**References**

- Dunn, A.J., Berridge, C.W., Lai, Y.I. & Yachabach, T.L. CRF-induced excessive grooming behavior in rats and mice. *Peptides* **8**, 841-4 (1987).
- Gargiulo, P.A. & Donoso, A.O. Distinct grooming patterns induced by intracerebroventricular injection of CRH, TRH and LHRH in male rats. *Braz J Med Biol Res* **29**, 375-9 (1996).
- Gargiulo, P.A. & Donoso, A.O. Luteinizing hormone releasing hormone (LHRH) in the periaqueductal gray substance increases some subcategories of grooming behavior in male rats. *Pharmacol Biochem Behav* **32**, 853-6 (1989).
- Gargiulo, P.A. Thyrotropin releasing hormone injected into the nucleus accumbens septi selectively increases face grooming in rats. *Braz J Med Biol Res* **29**, 805-10 (1996).
- Van Wimersma Greidanus, T.B. et al. Some characteristics of TRH-induced grooming behavior in rats. *Peptides* **9**, 283-8 (1988).
- Dunn, A.J. Studies on the neurochemical mechanisms and significance of ACTH-induced grooming. *Ann N Y Acad Sci* **525**, 150-68 (1988).
- Dunn, A.J. & Hurd, R.W. ACTH acts via an anterior ventral third ventricular site to elicit grooming behavior. *Peptides* **7**, 651-7 (1986).
- Dunn, A.J. & Vigle, G. Grooming behavior induced by ACTH involves cerebral cholinergic neurons and muscarinic receptors. *Neuropharmacology* **24**, 329-31 (1985).
- Guild, A.L. & Dunn, A.J. Dopamine involvement in ACTH-induced grooming behavior. *Pharmacol Biochem Behav* **17**, 31-6 (1982).
- Dunn, A.J., Guild, A.L., Kramarcy, N.R. & Ware, M.D. Benzodiazepines decrease grooming in response to novelty but not ACTH or beta-endorphin. *Pharmacol Biochem Behav* **15**, 605-8 (1981).
- Dunn, A.J., Green, E.J. & Isaacson, R.L. Intracerebral adrenocorticotrophic hormone mediates novelty-induced grooming in the rat. *Science* **203**, 281-3 (1979).
- Roseberry, A.G., Stuhrman, K. & Dunigan, A.I. Regulation of the mesocorticolimbic and mesostriatal dopamine systems by alpha-melanocyte stimulating hormone and agouti-related protein. *Neurosci Biobehav Rev* **56**, 15-25 (2015).
- Drago, F. & Lissandrello, C.O. The "low-dose" concept and the paradoxical effects of prolactin on grooming and sexual behavior. *Eur J Pharmacol* **405**, 131-7 (2000).

14. Srimontri, P. et al. Infusion of growth hormone into the hippocampus induces molecular and behavioral responses in mice. *Exp Brain Res* 232, 2957-66 (2014).
