# Supplementary material
Source: PubMed Central journal article supplement (PMC4840777)
Supplement: NIHMS777621-supplement-Supp4.pdf [file NIHMS777621-supplement-Supp4.pdf]

**Supplementary Table S4 | Genetically modified mouse strains with aberrant grooming behaviors\***

| Gene                             | Protein product                                                      | Model | Additional details                    |
|----------------------------------|----------------------------------------------------------------------|-------|---------------------------------------|
| <b><i>Reduced grooming</i></b>   |                                                                      |       |                                       |
| Adcyap1                          | Adenylate cyclase activating polypeptide 1                           | KO    |                                       |
| App                              | Amyloid precursor protein SNP (V717F)                                | TG    |                                       |
| Arid5b                           | AT rich interactive domain 5B                                        | KO    | Sparse ungroomed coat                 |
| Bdnf                             | Brain derived neurotrophic factor                                    | KO    | In HZ mice                            |
| Cckbr                            | Cholecystokinin B receptor                                           | KO    | ↓ Frequency                           |
| Chrna4                           | Cholinergic receptor, nicotinic, alpha polypeptide 4                 | KO    |                                       |
| Cplx1                            | Complexin 1                                                          | KO    | ↓ Syntactic chains, face/body washing |
| Cplx2                            | Complexin 2                                                          | KO    | ↓ Complete chains                     |
| Crhr2                            | Corticotropin releasing hormone receptor 2                           | KO    | ↓ Bouts                               |
| Dbh                              | Dopamine beta hydroxylase                                            | KO    | ↓ Bouts                               |
| Ddo                              | D-aspartate oxidase                                                  | KO    | ↓ Duration                            |
| Dkk3                             | Dickkopf homolog 3 ( <i>Xenopus laevis</i> )                         | KO    |                                       |
| Drd5                             | Dopamine receptor D5                                                 |       |                                       |
| Dst                              | Dystonin                                                             |       |                                       |
| En2                              | Engrailed 2                                                          |       |                                       |
| Espn                             | Espin                                                                |       |                                       |
| Gabra1                           | Gamma-aminobutyric acid (GABA) A receptor, alpha 1                   |       | Poor coat                             |
| Gja1                             | Gap junction protein, alpha 1                                        |       | Poor coat                             |
| Grm2                             | Glutamate receptor, metabotropic 2                                   |       |                                       |
| Gria2                            | Glutamate receptor, ionotropic, AMPA2 (alpha 2)                      |       |                                       |
| Gulo                             | Gulonolactone (L-) oxidase                                           |       |                                       |
| Hmox1                            | heme oxygenase (decycling) 1                                         |       | Poor coat                             |
| Itga7                            | Integrin alpha 7                                                     |       |                                       |
| Lass1                            | LAG1 homolog, ceramide synthase 1                                    |       | Due to poor balance                   |
| Lmx1a                            | LIM homeobox transcription factor 1 alpha                            |       | Due to aberrant posture               |
| Lrp6                             | Low density lipoprotein receptor-related protein 6                   |       | Poor coat                             |
| Mtap6                            | Microtubule-associated protein 6                                     |       |                                       |
| Ndufs4                           | NADH dehydrogenase (ubiquinone) Fe-S protein 4                       |       |                                       |
| Nfkb1                            | Nuclear factor of kappa light polypeptide gene enhancer in B-cells 1 |       |                                       |
| Nmur2                            | Neuromedin U receptor 2                                              |       |                                       |
| Otc                              | Ornithine transcarbamylase                                           |       |                                       |
| Oxt                              | Oxytocin                                                             |       |                                       |
| Pbx3                             | Pre B cell leukemia homeobox 3                                       |       | Poor grooming, ↑ latency              |
| Pitx3                            | Paired-like homeodomain transcription factor 3                       | KO**  | ↑ Latency                             |
| Plcb3                            | Phospholipase C, beta 3                                              | KO    | ↓ Scratching                          |
| Ppp1r1b                          | Protein phosphatase 1, regulatory subunit 1b                         | KO    | In females only                       |
| Ppt1                             | Palmitoyl-protein thioesterase 1                                     | KO    |                                       |
| Ptprf-Lar                        | Protein tyrosine phosphatase, receptor F                             | KO    |                                       |
| Sftpc                            | Surfactant associated protein C                                      | KO    | Poor coat                             |
| Slc9a1                           | Solute carrier family 9 (sodium/hydrogen exchanger) 1                | KO    | Poor coat                             |
| Smn1                             | Survival motor neuron 1                                              | KO    | In HZ, but not in -/- mice            |
| Tgfb1                            | Transforming growth factor, beta 1                                   | OE    | ↓ in adults                           |
| Vegfa                            | Vascular endothelial growth factor A                                 | KO    | Poor coat                             |
| <b><i>Increased grooming</i></b> |                                                                      |       |                                       |

## SUPPLEMENTARY INFORMATION

In format provided by Kalueff *et al.* (JANUARY 2016)

|         |                                                                                    |      |                                        |
|---------|------------------------------------------------------------------------------------|------|----------------------------------------|
| Arx     | Aristaless related homeobox                                                        | KO   | Vigorous grooming during seizure bouts |
| Atp2b4  | ATPase, Ca <sup>++</sup> transporting, plasma membrane 4                           | KO   | ↑ Scratching, skin lesion              |
| Bdnf    | Brain derived neurotrophic factor                                                  | OE   |                                        |
| Chst8   | carbohydrate (N-acetylgalactosamine 4-0) sulfotransferase 8                        | KO   |                                        |
| Cntnap2 | Contactin associated protein-like 2                                                | KO   | ↑ Duration                             |
| Ctsl    | Cathepsin L                                                                        | KO   | ↑ Scratching                           |
| Cyp19a1 | Cytochrome P450, family 19, subfamily a, polypeptide 1                             | KO   | ↑ Bouts                                |
| Dat     | Dopamine transporter                                                               | KD   | More rigid sequences                   |
| Drd1a   | Dopamine receptor D1A                                                              | KO   |                                        |
| Ehmt1   | Euchromatin histone methyltransferase 1                                            |      |                                        |
| Fmr1    | Fragile X mental retardation syndrome 1                                            |      | In social situations                   |
| Gad2    | Glutamic acid decarboxylase 2                                                      |      |                                        |
| Grhl1   | Grainyhead-like 1 ( <i>Drosophila</i> )                                            |      |                                        |
| Grpr    | Gastrin releasing peptide receptor                                                 |      | ↑ Scratching                           |
| Gsk3a   | Glycogen synthase kinase 3 alpha                                                   |      |                                        |
| Gstm1   | Glutathione S-transferase, mu 1                                                    |      |                                        |
| Hcrt    | Hypocretin                                                                         |      |                                        |
| Hoxb8   | Homeobox B8                                                                        | KO   |                                        |
| Hprt    | Hypoxanthine guanine phosphoribosyl transferase                                    |      |                                        |
| Htr2c   | 5-hydroxytryptamine (serotonin) receptor 2C                                        |      |                                        |
| Htt     | Huntingtin                                                                         |      |                                        |
| Itch    | Itchy, E3 ubiquitin protein ligase                                                 |      | ↑ Scratching                           |
| Itgb3   | Integrin beta 3                                                                    | KO   |                                        |
| Krt10   | Keratin 10                                                                         |      |                                        |
| Lrrk2   | Leucine-rich repeat kinase 2                                                       |      |                                        |
| Mao-A   | Monoamine oxidase A                                                                | KO   |                                        |
| Mapt    | Microtubule-associated protein tau                                                 |      | ↑ Scratching                           |
| Mecp2   | Methyl CpG binding protein 2                                                       |      |                                        |
| Ndn     | Necdin                                                                             |      | ↑ Scratching                           |
| Neurod2 | Neurogenic differentiation 2                                                       |      |                                        |
| Nfkbiz  | Nuclear factor of kappa light polypeptide gene enhancer in B-cells inhibitor, zeta |      | ↑ Scratching                           |
| Nk1r    | Neurokinin 1 receptor                                                              |      |                                        |
| Nlgn1   | Neuroigin 1                                                                        |      |                                        |
| Nos1    | Nitric oxide synthase 1, neuronal                                                  |      |                                        |
| Nr4a2   | Nuclear receptor subfamily 4, group A, member 2                                    | KO** | In response to L-DOPA                  |
| Nrxn1   | Neurexin 1                                                                         |      |                                        |
| Oxtr    | Oxytocin receptor                                                                  | KO   |                                        |
| Per1    | Period homolog ( <i>Drosophila</i> ) 1                                             | KO   | Under acute stress                     |
| Plg     | Plasminogen                                                                        | KO   |                                        |
| Prrxl1  | Paired related homeobox protein-like 1                                             | KO   |                                        |
| Rad23b  | RAD23b homolog ( <i>S. cerevisiae</i> )                                            | KO   | Washing and scratching                 |
| Sapap3  | SAP90/PSP-95 associated protein 3                                                  | KO   |                                        |
| Sert    | Serotonin transporter (SLC6a4)                                                     | KO   | In HZ mice                             |
| Shank3  | SH3/ankyrin domain gene 3                                                          | KO   |                                        |
| Slc17a6 | Solute carrier family 17 (sodium-dependent phosphate cotransporter) 6              | KO   | ↑ Scratching                           |
| Slitrk5 | SLIT and NTRK-like family, member 5                                                | KO   |                                        |
| Spred2  | Sprouty-related protein, EVH1 domain 2                                             | KO   |                                        |
| Tgfb1   | Transforming growth factor, beta 1                                                 | OE   | ↑ Postnatally                          |
| Tnf     | Tumor necrosis factor                                                              | KO   | ↑ Duration                             |
| Vdr     | Vitamin D receptor                                                                 | KO   |                                        |

KO – knockout (-/-), OE – over-expression, KD – knockdown, TG – transgenic, HZ – heterozygous (+/-) mice

\* Based on Mouse Genome Informatics Database, [www.informatics.jax.org](http://www.informatics.jax.org). As of June 2015, over 170 mouse strains from MGI display aberrant grooming-related phenotypes.

\*\* Conditional KO

\*\*\* Spontaneous mutagenesis
