# Supplementary material
Source: PubMed Central journal article supplement (PMC4840777)

**Supplementary Figure S5** | Shown here are examples of rodent self-grooming and its patterning in context of automated behavioral analyses (images – courtesy of Metris BV (Netherlands) and CleverSys, Inc., USA; also see Supplementary Table S6 online). Inset shows various rodent behaviors based on their overall complexity and sequential nature. For example, compared with self-grooming, walking and locomotion are highly sequential, but relatively simple behaviorally, whereas social behaviors are rather complex, but less patterned. Vibration-based and heat-based signals can be useful for recording grooming behavior during the dark cycle.

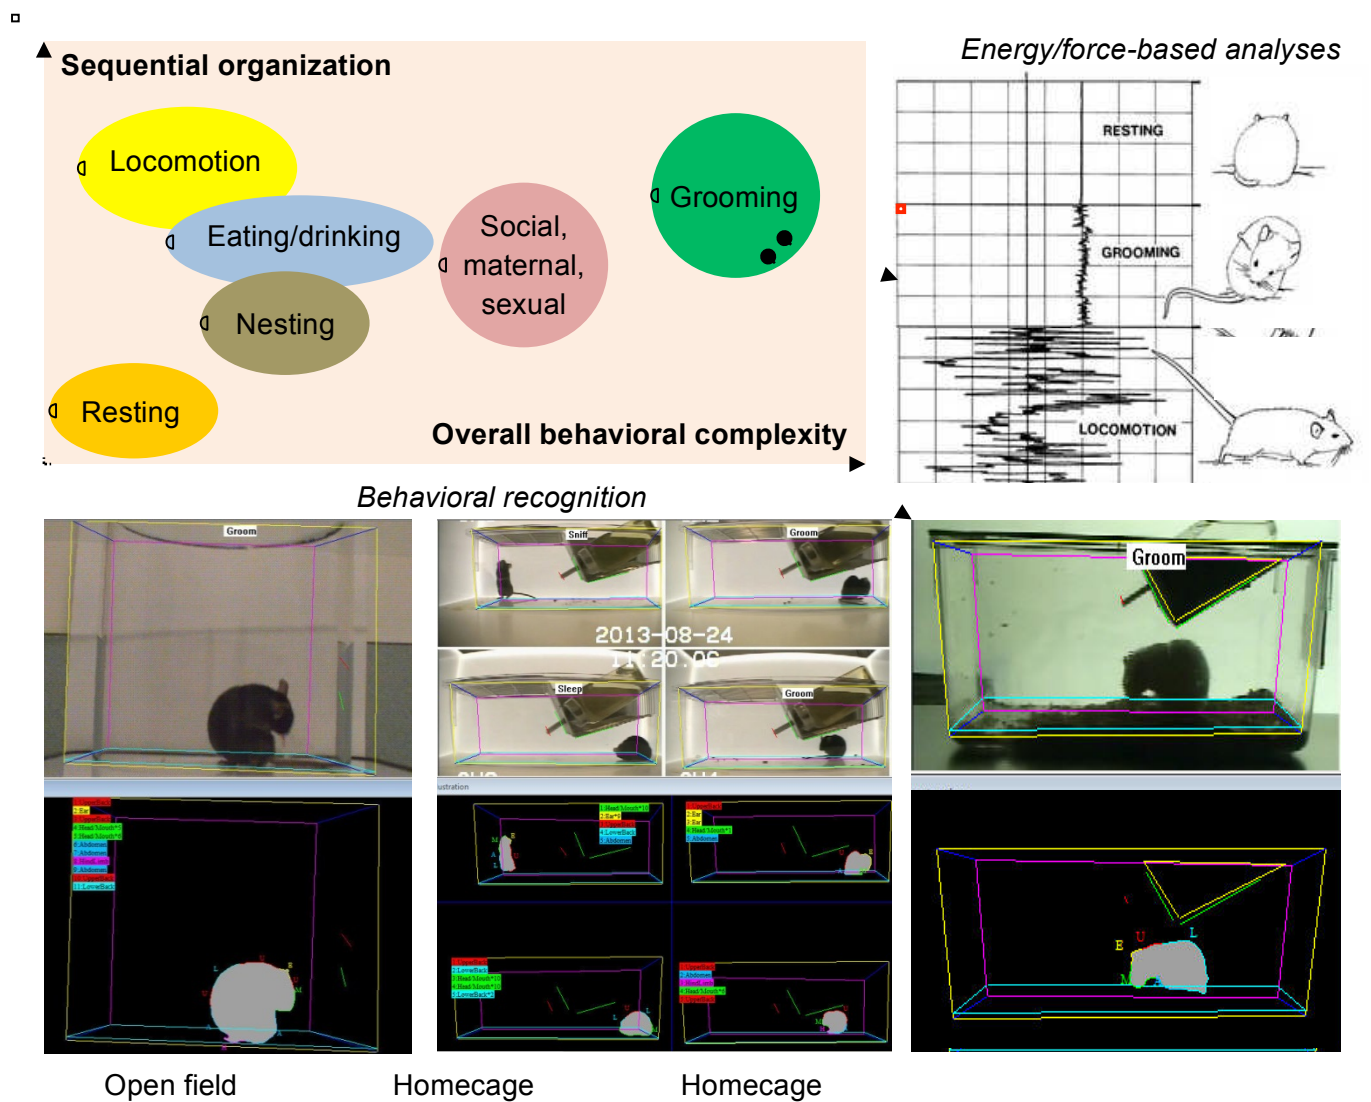

Supplement: NIHMS777621-supplement-Supp5.pdf [file NIHMS777621-supplement-Supp5.pdf]
