# Supplementary material
Source: PubMed Central journal article supplement (PMC4840777)
Supplement: NIHMS777621-supplement-Supp6.pdf [file NIHMS777621-supplement-Supp6.pdf]

**Supplementary Information S6 | Summary of currently available software-based solutions for rodent grooming behavioral analyses (information as provided by developers in Summer 2015)**

| Software                | Company                                                         | Available since | Detection principle          | Grooming activity endpoints  | Ability to detect individual stages of grooming                                   |
|-------------------------|-----------------------------------------------------------------|-----------------|------------------------------|------------------------------|-----------------------------------------------------------------------------------|
| LABORAS                 | Metris BV (Netherlands)                                         | 1995            | Energy change                | Frequency, duration, latency | Face, head, body, hindleg and genital grooming, scratching (Fig. 1S) <sup>1</sup> |
| HomeCage Scan           | CleverSys, Inc. (USA)                                           | 2002            | Video-tracking               | Frequency, duration, latency | Face and body grooming, paw licking (Fig. 1S) <sup>2</sup>                        |
| TopScan                 | CleverSys, Inc. (USA)                                           | 2013            | Video-tracking               | Frequency, duration, latency | -                                                                                 |
| Behavioral Spectrometer | Behavioral Instruments, Inc. (USA) and BiObserve GmbH (Germany) | 2014            | Vibration and video-tracking | Frequency, duration, latency | Paw, nose, cheek, face, back, belly and genital grooming, scratching <sup>3</sup> |
| EthoVision XT           | Noldus IT BV (Netherlands)                                      | 2015            | Video-tracking               | Frequency, duration, latency | - <sup>4</sup>                                                                    |

**References:**

1. Chen, S.K. et al. Hematopoietic origin of pathological grooming in Hoxb8 mutant mice. *Cell* **141**, 775-85 (2010).
2. Kyzar, E.J. et al. Alterations in grooming activity and syntax in heterozygous SERT and BDNF knockout mice: the utility of behavior-recognition tools to characterize mutant mouse phenotypes. *Brain Res Bull* **89**, 168-76 (2012).
3. Brodtkin, J. et al. Validation and implementation of a novel high-throughput behavioral phenotyping instrument for mice. *J Neurosci Methods* **224**, 48-57 (2014).
4. van Dam, E.A. et al. An automated system for the recognition of various specific rat behaviours. *J Neurosci Methods* **218**, 214-24 (2013).
